# Supplementary material
Source: publisher figshare collection journal article supplement (https://tandf.figshare.com/ndownloader/files/18813470)
Supplement: Supplementary file 1 [file 18813470]

**Notes for all supplemental tables**

1. Participant numbers have been assigned arbitrarily; a participant assigned the number 1 for usual-response foot-off time does not necessarily correspond with the participant of the same number for dual-task foot-off time.

2. When there are missing data for the post-training or follow-up assessment, the mean value at that time point is calculated as (e.g., for follow-up):

(i.e., admission score minus average difference between follow-up and admission scores). Confidence interval is calculated using the standard deviation of follow-up values.

**Supplemental table 1:** Individual participant data for foot-off times (ms) during usual-response trials.

| **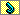Participant #** | **Admission** | **Discharge** | **Follow-up** | |
| --- | --- | --- | --- | --- |
| *Historical control group* | | | |
| RBT003 | 939 | 502 | - | |
| RBT004 | 422 | 518 | 383 | |
| RBT010 | 455 | 470 | 437 | |
| RBT022 | 452 | 398 | 512 | |
| RBT040 | 404 | 308 | 323 | |
| RBT041 | 550 | 467 | - | |
| RBT042 | 693 | 280 | - | |
| RBT043 | 449 | 409 | 432 | |
| RBT044 | 436 | 409 | 405 | |
| RBT062 | 414 | 340 | 326 | |
| RBT065 | 438 | 488 | - | |
| RBT066 | 462 | 340 | 324 | |
| RBT068 | 427 | 337 | 404 | |
| RBT083 | 688 | 357 | 469 | |
| RBT086 | 405 | - | 398 | |
| Mean [95% CI] | 509 [432, 585] | 394 [354, 435] | 454 [418, 490] | |
| *Reactive balance training group* | | | |
| RBT016 | 406 | 387 | 272 | |
| RBT038 | 421 | 422 | 364 | |

CI: confidence interval.

**Supplemental table 2:** Individual participant data for foot-off times (ms) during dual-task trials.

| **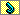Participant #** | **Admission** | **Discharge** | **Follow-up** |
| --- | --- | --- | --- |
| *Historical control group* | | | |
| RBT007 | 410 | 520 | - |
| RBT010 | 566 | 809 | 535 |
| RBT014 | 469 | 473 | - |
| RBT020 | 547 | 469 | - |
| RBT022 | 582 | 637 | 820 |
| RBT023 | 535 | 391 | 297 |
| RBT031 | 410 | 309 | 348 |
| RBT043 | 496 | 527 | - |
| RBT044 | 516 | 504 | 369 |
| RBT055 | 418 | 395 | - |
| RBT061 | 445 | 484 | 434 |
| RBT062 | 434 | 355 | 352 |
| RBT065 | 555 | 551 | - |
| RBT066 | 457 | 402 | 398 |
| RBT086 | 457 | - | 422 |
| RBT103 | 543 | 309 | 320 |
| Mean [95% CI] | 490 [461, 519] | 473 [408, 539] | 425 [330, 520] |
| *Reactive balance training group* | | | |
| RBT012 | 480 | 348 | 383 |
| RBT034 | 425 | 328 | - |
| RBT038 | 684 | 461 | 410 |
| RBT039 | 609 | 445 | 383 |

CI: confidence interval.

**Supplemental table 3:** Individual participant data for slide steps (proportion of trials) during usual-response trials.

| **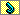Participant #** | **Admission** | **Discharge** | **Follow-up** |
| --- | --- | --- | --- |
| *Historical control group* | | | |
| RBT007 | 0.67 | 0.40 | - |
| RBT008 | 0.25 | 0 | - |
| RBT040 | 0.50 | 0.33 | 0 |
| RBT042 | 0.25 | 0.40 | - |
| RBT055 | 0.33 | 0 | 0 |
| RBT105 | 0.67 | 0.75 | 0.25 |
| Mean [95% CI] | 0.44 [0.29, 0.60] | 0.31 [0.09, 0.54] | 0.03 [0, 0.19]* |
| *Reactive balance training group* | | | |
| RBT001 | 0.33 | 0 | - |
| RBT002 | 0.25 | 0 | - |
| RBT013 | 0.25 | 0 | - |
| RBT029 | 0.33 | 0 | - |
| RBT038 | 0.75 | 0 | 0 |
| RBT039 | 0.33 | 0 | 0 |
| RBT102 | 0.50 | 0.25 | 0 |

*The lower limit of the CI is calculated to be <0.

CI: confidence interval.

**Supplemental table 4:** Individual participant data for steps with the blocked limb (proportion of trials) during encouraged-use trials.

| **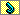Participant #** | **Admission** | **Discharge** | **Follow-up** |
| --- | --- | --- | --- |
| *Historical control group* | | | |
| RBT003 | 1 | 1 | - |
| RBT007 | 0.40 | 0.80 | - |
| RBT014 | 0.20 | 0 | 0 |
| RBT018 | 0.20 | 0 | - |
| RBT020 | 1 | 1 | - |
| RBT022 | 0.25 | 0 | 0 |
| RBT023 | 0.80 | 1 | 1 |
| RBT027 | 0.40 | 0 | 0 |
| RBT037 | 0.80 | 0.20 | 0.20 |
| RBT040 | 1 | 1 | - |
| RBT041 | 0.67 | 0.80 | - |
| RBT042 | 1 | 0.60 | - |
| RBT044 | 0.80 | 0.20 | 0.80 |
| RBT063 | 0.50 | 0.25 | 0.25 |
| RBT068 | 0.20 | 0 | 0 |
| RBT071 | 0.75 | 0 | 0.50 |
| RBT072 | 1 | 0 | 0 |
| RBT075 | 0.80 | 0 | 0 |
| RBT086 | 1 | - | 0 |
| RBT088 | 0.25 | - | 0.25 |
| RBT105 | 1 | 1 | 1 |
| RBT106 | 0.20 | 0 | 0 |
| Mean [95% CI] | 0.64 [0.51, 0.78] | 0.39 [0.20, 0.58] | 0.32 [0.16, 0.47] |
| *Reactive balance training group* | | | |
| RBT002 | 0.25 | 0 | - |
| RBT006 | 1 | 0.33 | - |
| RBT012 | 0.20 | - | 0.20 |
| RBT015 | 0.67 | 0 | - |
| RBT016 | 0.20 | 0 | 0.60 |
| RBT035 | 1 | 0.50 | - |
| RBT037 | 0.80 | - | 0.40 |
| RBT038 | 1 | 0 | 0 |
| RBT060 | 0.20 | 0.40 | 0.40 |
| RBT099 | 1 | 0 | 0 |

CI: confidence interval.
